# Supplementary material
Source: publisher site journal article supplement (https://www.dovepress.com/get_supplementary_file.php?f=493499.docx)
Supplement: Supplementary file 1 [file get_supplementary_file.php]

**Supplementary Online Content**

Jørgensen CM, Boe NJ, Hald SM, et al **Association of prior antithrombotic use with 90-day mortality after intracerebral hemorrhage**

**eMethods.** Supplemental methods

**eReferences**

**eTable 1**. Diagnosis and procedure codes for study covariates retrieved from Danish nationwide registries.

**eTable 2**. Baseline characteristics of patients with intracerebral hemorrhage included in comparison of current oral anticoagulant use vs no antithrombotic use.

**eTable 3**. Baseline characteristics of patients with intracerebral hemorrhage included in comparison of current platelet antiaggregant use vs no antithrombotic use.

**eTable 4** Baseline characteristics of patients with intracerebral hemorrhage by class of antithrombotic (oral anticoagulants vs platelet antiaggregants).

**eTable 5.** Clinical parameters at time of admission of patients with intracerebral hemorrhage

included in analyses by class of antithrombotic.

**eTable 6**. Brain CT characteristics of patients with intracerebral hemorrhage included in analyses by class of antithrombotic.

**eTable 7**. Preadmission functional level and living arrangement and post intracerebral hemorrhage functional outcomes and mortality by prior antithrombotic use.

**eTable 8.** Baseline characteristics of patients with intracerebral hemorrhage by type of oral anticoagulant.

**eTable 9**. Baseline characteristics of patients with intracerebral hemorrhage by type of platelet antiaggregant.

**eTable 10.** Clinical parameters at time of admission of patients with intracerebral hemorrhage included in analyses by type of antithrombotic.

**eTable 11**. Brain CT characteristics of patients with intracerebral hemorrhage included in analyses by type of antithrombotic.

**eTable 12**. Relative risk of death within 90-days of ICH by type of antithrombotic drug use (active comparator analysis) in patients scanned within 24 hours of ICH onset.

**eTable 13**. Relative risk of death within 90-days of intracerebral hemorrhage in patients with current use of a DOAC vs VKA – only naive users included.

**eTable 14.** Relative risk of death within 90-days of intracerebral hemorrhage in patients with current use of a DOAC vs VKA – only patients not treated with reversal agents included.

**eTable 15**. Relative risk of death within 90-days of intracerebral hemorrhage in patients with current use of a DOAC vs VKA – VKA use defined without attention to INR and only including patients with prescriptions covering the date of ICH onset.

**eTable 16.** Change in volume of hematoma on first control scan performed within 3 days of index CT in selected patients with intracerebral hemorrhage.

**eTable 17**. Relative risk of death within 90-days of intracerebral hemorrhage in patients with current use of an antithrombotic drug stratified by do-not-resuscitate orders given within 24 hours of admission.

**eFigure 1**. Illustration of the study design.

**eMethods**

**The Intracerebral Hemorrhage Cohort**

As previously described,2–4 patients with a first-ever intracerebral hemorrhage (ICH) in RSD from 2009 to 2018 were identified by retrieving data from the Danish Stroke Registry5 (Stroke Registry) and the Danish National Patient Registry6 (Patient Registry) for all hospitalizations coded as ICH. Based on discharge summaries and brain scan reports and using a validated method,7 the diagnosis was verified and the sample was limited to spontaneous parenchymal ICH (s-ICH). For this study, we restricted the cohort to patients age ≥55 years at time of ICH onset (because younger patients are more likely to have no s-ICH) and to the years 2015-2018 (because electronic health records (EHRs) and brain scans were available for all hospital departments in the region in this period).

Complete EHRs from all relevant departments at hospitals in the RSD were reviewed by 3 study physicians supervised by a neurologist with special interest in stroke.4 EHR data were abstracted to a structured form including the time and date of key events such as the last dose of AT, ICH onset, and timing of admission and index brain CT scan.8 Information on the timing of the last AT dose was inconsistently recorded in medical records and was therefore not used in the analyses. Clinical data were also collected on Glascow Coma Scale (GCS) score on hospital arrival, acute lowering of blood pressure, OAC reversal, do-not-resuscitate (DNR) orders, international normalized ratio (INR; initial value upon admission), and functional outcomes (detailed below).

The first CT brain scan performed after ICH (index CT) was systematically reviewed by 2 radiology residents with at least 1-year of radiology experience who were masked to clinical data (including exposure to ATs) and who were supervised by a neuroradiologist.4

The location of the hematoma was classified according to the Cerebral Haemorrhage Anatomical Rating Instrument,9 CHARTS, hematoma volume was measured using the ABC/2 method,10 and presence of intraventricular extension was assessed.

**Potential Confounders**

Data from EHRs were extracted to classify lifestyle habits (smoking and alcohol use). Data from the Patient Registry (diagnosis codes from admissions or outpatient units, primary or secondary position codes) and the Prescription Registry were used to classify each patient’s history of co-morbidity and concomitant medication prescriptions. All available data from both registries were used from January 1995 until and including the date of the index ICH. In addition, for history of ischemic stroke, data were also extracted from the Stroke Registry (starting in 2003, the year the registry became operational). Prescription for other medications, (i.e., drugs with antihypertensive effects; see eTable 1), NSAIDS, SSRIs, statins, and PPIs, were classified as current if the respective drugs prescription supply ended 0-30 days before index date.

**Statistical Analyses**

Binomial regression was used to calculate the relative risk (RR) and 95% confidence intervals (CIs) of 90-day survival after s-ICH, adjusted for age, sex, and additional potential confounders (as listed above) using standardized mortality ratio weights (SMRW) for comparisons between patients with current use of a drug vs. no use of AT (OAC/PA vs no AT), whereas inverse probability of treatment weighting (IPTW) was used for active comparator analyses ( OAC vs PA, DOAC vs VKA and clopidogrel vs aspirin) as recommended by Desai and Franklin.11 We decided to use these two different weighting approaches, as they standardize to different comparators, the SMRW standardizing both exposed groups (OAC, respectively, PA) to be similar to the reference group of unexposed, hence an asymmetric standardization. On the other hand, the IPTW standardized both exposed groups to be similar to each other, hence a symmetric standardization. We capped weights at the 99% percentile by replacing them with the 99% weight percentile (winsorisation) to avoid extreme weights in the SMRW/IPTW.12 We calculated standardized difference of means (for categorical variables as proposed by Austin13). We calculated RRs separately for active comparator analyses (i.e., OAC vs PA, reference and DOAC vs VKA, reference and clopidogrel vs aspirin, reference). We calculated 4 separate SMRW/IPTW scores corresponding to each of the following analyses: current OAC vs current PA vs no AT; current OAC vs current PA; current DOAC vs current VKA use; current aspirin vs current clopidogrel use. Within each of these 4 groups, we used the same SMRW/IPTW scores in the main analysis and in sub-analyses (supplementary and sensitivity analyses).

**Supplementary analyses**

Change in hematoma volume from index scan to control scan was investigated in a post-hoc analysis. Follow-up scans were searched for among 188 of 206 patients classified as having a current OAC use (18 not included for technical reasons) and 171 of 200 patients randomly selected among patients classified as not having current OAC use (68 PA, 103 no AT; 29 not included for technical reasons). We used the first follow-up scan performed within 3 days of the index scan to calculate volume changes. In these post-hoc analyses, in order to estimate volume changes with greater precision, semiautomated volumetry using ITK-SNAP14 was used to measure hematoma volumes on both the index and follow-up scans.

**eReferences**

1. Henriksen DP, Rasmussen L, Hansen MR, Hallas J, Pottegård A. Comparison of the Five Danish Regions Regarding Demographic Characteristics, Healthcare Utilization, and Medication Use--A Descriptive Cross-Sectional Study. PLoS ONE. 2015;10:e0140197.

2. Hald S, Sloth C, Agger M, et al. The validity of intracerebral hemorrhage diagnoses in the Danish Patient Registry and the Danish Stroke Registry. Clinical Epidemiology. 2020;12:1313–1326.

3. Boe NJ, Hald SM, Jensen MM, et al. Association Between Statin Use and Intracerebral Hemorrhage Location: A Nested Case-Control Registry Study. Neurology. 2023;100:e1048–e1061.

4. Boe NJ, Hald SM, Kristensen AR, et al. Association of Antithrombotic Drug Use With Incident Intracerebral Hemorrhage Location. Neurology. 2024;102:e209442.

5. Johnsen SP, Ingeman A, Hundborg HH, Schaarup SZ, Gyllenborg J. The Danish Stroke Registry. Clin Epidemiol. 2016;8:697–702.

6. Schmidt M, Schmidt SAJ, Sandegaard JL, Ehrenstein V, Pedersen L, Sørensen HT. The Danish National Patient Registry: a review of content, data quality, and research potential. Clin Epidemiol. 2015;7:449–490.

7. Hald SM, Kring Sloth C, Hey SM, et al. Intracerebral hemorrhage: positive predictive value of diagnosis codes in two nationwide Danish registries. Clin Epidemiol. 2018;10:941–948.

8. Concha M, Cohen AT. Recommendations for Research Assessing Outcomes for Patients With Anticoagulant-Related Intracerebral Bleeds. Stroke. 2021;52:1520–1526.

9. Charidimou A, Schmitt A, Wilson D, et al. The Cerebral Haemorrhage Anatomical RaTing inStrument (CHARTS): Development and assessment of reliability. J Neurol Sci. 2017;372:178–183.

10. Kothari RU, Brott T, Broderick JP, et al. The ABCs of measuring intracerebral hemorrhage volumes. Stroke. 1996;27:1304–1305.

11. Desai RJ, Franklin JM. Alternative approaches for confounding adjustment in observational studies using weighting based on the propensity score: a primer for practitioners. BMJ. 2019;367:l5657.

12. Cole SR, Hernán MA. Constructing inverse probability weights for marginal structural models. Am J Epidemiol. 2008;168:656–664.

13. Austin PC. An Introduction to Propensity Score Methods for Reducing the Effects of Confounding in Observational Studies. Multivariate Behav Res. 2011;46:399–424.

14. Yushkevich PA, Piven J, Hazlett HC, et al. User-guided 3D active contour segmentation of anatomical structures: significantly improved efficiency and reliability. Neuroimage. 2006;31:1116–1128.

**eTable 1**. Diagnosis and procedure codes for study covariates retrieved from Danish nationwide registries.

|  | **Diagnosis Codes (ICD-10) or Procedure codes** | **Drug (ATC) codes** |
| --- | --- | --- |
| **Covariates – disorders** |  |  |
| **Based on diagnoses**a**/drug prescription** |  |  |
| Hypertension | I10-I15 | C03A, C08CA, C08DB01, C09A, C09B, C09C, C09D |
| Diabetes | E10-E14 | A10 |
| Atrial fibrillation | I48 |  |
| Ischemic strokeb | I63, I64 |  |
| Myocardial infarction | I21, I22, I23 |  |
| Congestive heart failure | I110, I130, I132, I420, I426, I427, I428, I429, I50 |  |
| Peripheral arterial disease (PAD) | I702, I739 |  |
| Diabetes | E10-E14 | A10 |
| Venous thromboembolism (DVT or pulmonary embolism) | I26, I801, I802, I803, I808, I809 |  |
| Chronic kidney diseases | N18 (excluding N181), N19, Z992, Z940 |  |
| Gastrointestinal bleed (upper, lower, or unspecified) | K228F, K250, K252, K254, K256, K260, K262, K638B, K264, K266, K270, K272, K274, K276, K280, K282, K284, K286, K290, K298A, K625, K638B, K638C, K290-K292, K920, K921, K922 |  |
| High alcohol intake (disorders/events or drug prescription indicative of alcohol abuse) | E244, F10, G312, G621, G721, I426, K292, K70, K860, T510, T519, Z502, Z714, Z721, | N07BB |
| Chronic kidney diseases | N18 (excluding N181), N19, Z992, Z940 |  |
| Mechanical heart valvec | Procedure code: KFKD00 KFMD00 KFGE00 KFJF00 (Since 1996)  [No specific codes available prior to 1996] |  |
| Mitral valve stenosisc | I050, I052, I080A, I081A, I083A, I342, Z952 |  |
| **Covariates – drug prescriptions** | | |
| Antiplatelet drugs |  |  |
| Low-dose aspirin |  | B01AC06 – acetylsalicylic acid (75 mg, 100 mg, or 150 mg per tablet)  B01AC30 - acetylsalicylic acid (50 mg per tablet) in combination with dipyridamole |
| Clopidogrel |  | B01AC04 (75 mg per tablet) |
| Oral anticoagulants |  |  |
| Vitamin K antagonists |  | B01AA – warfarin, phenprocoumon |
| Direct oral anticoagulants |  | B01AE07 – dabigatran  B01AF01 – rivaroxaban  B01AF02 – apixaban  B01AF03 – edoxaban |
| Statins |  | C10AA |
| Drugs with antihypertensive effectsd  [thiazides and other non-loop diuretics, loop-diuretics, beta-blockers, calcium channel blockers, ACE-inhibitor and angiotensin II receptor blockers (plain or in combinations] |  | C03A, C03D, C03E, C03C, C07, CO8, C09A, C09B, C09C, C09D |
| Nonsteroidal anti-inflammatory drugs |  | MO1A (including Cox2 inhibitors), excluding M01AX |
| Selective serotonin reuptake inhibitor |  | N06AB |
| Proton pump inhibitors |  | A02BC |

aPrimary or secondary diagnosis position codes in inpatient or outpatient data.

bData extracted from both the Danish National Patient Registry and the Danish Stroke Registry.

cUsed to exclude patients with these diagnoses, where warfarin is recommended over direct oral anticoagulant as preventive anticoagulant therapy.

dIndication for drug prescription not available to us and some of these drugs may have been used for indications other than hypertension. Note that ‘ever use’ of some of these drugs was included in definition of hypertension covariate (i.e., C03A, C08CA, C08DB01, C09A, C09B, C09C, C09D).

**eTable 2**. Baseline characteristics of patients with intracerebral hemorrhage included in comparison of current oral anticoagulant use vs no antithrombotic use.

|  | **Crude data** | | |  | **Weighted data**c | | |
| --- | --- | --- | --- | --- | --- | --- | --- |
| **Characteristic**  No. (%) unless otherwise stated | **Current OAC use (DOAC or VKA)**a,b  **(n=206)** | **No use of any antithrombotic**a  **(n=428)** | **Standardized difference** |  | **Current OAC use (DOAC or VKA)**a,b  **(n=206)** | **No use of any antithrombotic**a  **(n=428)** | **Standardized difference** |
| Age, mean (SD) | 79.9 (8.3) | 72.5 (9.7) | 0.82 |  | 79.9 (8.3) | 80.4 (8.7) | <0.01 |
| **Sex** |  |  |  |  |  |  |  |
| Men | 114 (55.3) | 215 (50.2) | 0.10 |  | 114.0 (55.3) | 180.1 (42.1) | 0.27 |
| Women | 92 (44.7) | 213 (49.8) | 0.10 |  | 92.0 (44.7) | 247.9 (57.9) | 0.27 |
| **Lifestyle data** |  |  |  |  |  |  |  |
| Smokerd |  |  |  |  |  |  |  |
| Current | 26 (12.6) | 85 (19.9) | 0.20 |  | 26.0 (12.6) | 42.2 (9.9) | 0.09 |
| Former | 68 (33.0) | 109 (25.5) | 0.17 |  | 68.0 (33.0) | 156.6 (36.6) | 0.08 |
| Non-smoker | 94 (45.6) | 172 (40.2) | 0.11 |  | 94.0 (45.6) | 189.2 (44.2) | 0.03 |
| Missing values | 18 (8.7) | 62 (14.5) | 0.18 |  | 18.0 (8.7) | 40.0 (9.3) | 0.02 |
| Alcohol use4, weekly units |  |  |  |  |  |  |  |
| >7 (women)/>14 (men) | 174 (84.5) | 330 (77.1) | 0.19 |  | 174.0 (84.5) | 376.3 (87.9) | 0.10 |
| ≤7 (women)/ ≤14 (men) | 15 (7.3) | 55 (12.9) | 0.19 |  | 15.0 (7.3) | 17.9 (4.2) | 0.13 |
| Missing values | 17 (8.3) | 43 (10.0) | 0.06 |  | 17.0 (8.3) | 33.9 (7.9) | 0.01 |
| **Medical history** |  |  |  |  |  |  |  |
| Hypertensione,f | 182 (88.3) | 253 (59.1) | 0.70 |  | 182.0 (88.3) | 382.0 (89.3) | 0.03 |
| Diabetese | 39 (18.9) | 32 (7.5) | 0.34 |  | 39.0 (18.9) | 69.5 (16.2) | 0.07 |
| Prior ischemic strokee | 45 (21.8) | 10 (2.3) | 0.63 |  | 45.0 (21.8) | 45.7 (10.7) | 0.31 |
| Prior myocardial infarctione | 17 (8.3) | <5 | 0.36 |  | 17.0 (8.3) | 19.2 (4.5) | 0.16 |
| Congestive heart failuree | 38 (18.4) | 8 (1.9) | 0.57 |  | 38.0 (18.4) | 71.2 (16.6) | 0.05 |
| Peripheral artery diseasee | 20 (9.7) | 10 (2.3) | 0.31 |  | 20.0 (9.7) | 33.0 (7.7) | 0.07 |
| Chronic kidney failuree | 14 (6.8) | 8 (1.9) | 0.24 |  | 14.0 (6.8) | 31.5 (7.4) | 0.02 |
| Prior GIBe | 27 (13.1) | 30 (7.0) | 0.20 |  | 27.0 (13.1) | 46.7 (10.9) | 0.07 |
| Disorders indicative of high alcohol intakee,f | 15 (7.3) | 41 (9.6) | 0.08 |  | 15.0 (7.3) | 22.0 (5.2) | 0.09 |
| **Concomitant medication**f |  |  |  |  |  |  |  |
| Antihypertensives | 161 (78.2) | 123 (28.7) | 1.14 |  | 161.0 (78.2) | 326.3 (76.2) | 0.05 |
| Statins | 86 (41.7) | 52 (12.1) | 0.71 |  | 86.0 (41.7) | 154.2 (36.0) | 0.12 |
| NSAIDs | 12 (5.8) | 35 (8.2) | 0.09 |  | 12.0 (5.8) | 21.6 (5.1) | 0.03 |
| SSRIs | 26 (12.6) | 24 (5.6) | 0.25 |  | 26.0 (12.6) | 43.2 (10.1) | 0.08 |
| PPIs | 44 (21.4) | 70 (16.4) | 0.13 |  | 44.0 (21.4) | 72.5 (16.9) | 0.11 |

Abbreviations: DOAC: direct oral anticoagulant; GIB: gastrointestinal bleed; NSAID: nonsteroidal anti-inflammatory drug; OAC: oral anticoagulant; SSRI: selective serotonin reuptake inhibitor; PPI: proton pump inhibitor; VKA: vitamin K antagonist.

Cells with <5 counts not specified to comply with cell suppression policy.

aCurrent use and no use defined in main text.

bPatients with concurrent use of antiplatelets (clopidogrel or low-dose aspirin) were excluded from the analyses (n=18).

cStandardized mortality ratio used for weighting.

dInformation extracted from medical records (ICH admission record or, if not recorded there, most recent admission before ICH onset).

eAccording to data from Danish National Patient Registry or Danish National Prescription Registry.

fAccording to data from Danish National Prescription Registry.

**eTable 3**. Baseline characteristics of patients with intracerebral hemorrhage included in comparison of current platelet antiaggregant use vs no antithrombotic use.

|  | **Crude data** | | |  | **Weighted data**c | | |
| --- | --- | --- | --- | --- | --- | --- | --- |
|  | **Current platelet antiaggregant use (clopidogrel or aspirin)**a,b  **(n=270)** | **No use of any antthrombotic**a  **(n=428)** | **Standardized difference** |  | **Current platelet antiaggregant use (clopidogrel or aspirin)**a,b  **(n=270)** | **No use of any antithrombotic**a  **(n=428)** | **Standardized difference** |
| Age, mean (SD) | 78.8 (9.4) | 72.5 (9.7) | 0.66 |  | 78.8 (9.4) | 79.0 (9.8) | <0.01 |
| **Sex, no. (%)** |  |  |  |  |  |  |  |
| Men | 132 (48.9) | 215 (50.2) | 0.03 |  | 132 (48.9) | 193.2 (45.1) | 0.08 |
| Women | 138 (51.1) | 213 (49.8) | 0.03 |  | 138 (51.1) | 234.8 (54.9) | 0.08 |
| **Lifestyle data** |  |  |  |  |  |  |  |
| Smokerd |  |  |  |  |  |  |  |
| Current | 44 (16.3) | 85 (19.9) | 0.09 |  | 44 (16.3) | 69.1 (16.1) | <0.01 |
| Former | 79 (29.3) | 109 (25.5) | 0.09 |  | 79 (29.3) | 129.6 (30.3) | 0.02 |
| Non-smoker | 121 (44.8) | 172 (40.2) | 0.09 |  | 121 (44.8) | 189.5 (44.3) | 0.01 |
| Missing values | 26 (9.6) | 62 (14.5) | 0.15 |  | 26 (9.6) | 39.7 (9.3) | 0.01 |
| Alcohol used, weekly units |  |  |  |  |  |  |  |
| >7 (women)/>14 (men) | 213 (78.9) | 330 (77.1) | 0.04 |  | 213 (78.9) | 337.5 (78.9) | <0.01 |
| ≤7 (women)/ ≤14 (men) | 24 (8.9) | 55 (12.9) | 0.13 |  | 24 (8.9) | 40.3 (9.4) | 0.02 |
| Missing values | 33 (12.2) | 43 (10.0) | 0.07 |  | 33 (12.2) | 50.2 (11.7) | 0.02 |
| **Medical history, no. (%)** |  |  |  |  |  |  |  |
| Hypertensione,f | 226 (83.7) | 253 (59.1) | 0.57 |  | 226 (83.7) | 363.0 (84.8) | 0.03 |
| Diabetese,f | 42 (15.6) | 32 (7.5) | 0.26 |  | 42 (15.6) | 64.7 (15.1) | 0.01 |
| Venous thromboembolisme | 12 (4.4) | 13 (3.0) | 0.07 |  | 12 (4.4) | 25.6 (6.0) | 0.07 |
| Atrial fibrillatione | 26 (9.6) | 15 (3.5) | 0.25 |  | 26 (9.6) | 38.6 (9.0) | 0.02 |
| Prior ischemic strokee | 76 (28.1) | 10 (2.3) | 0.77 |  | 76 (28.1) | 65.5 (15.3) | 0.32 |
| Prior myocardial infarctione | 26 (9.6) | <5 | 0.40 |  | 26 (9.6) | 14.7 (3.4) | 0.25 |
| Congestive heart failuree | 15 (5.6) | 8 (1.9) | 0.20 |  | 15 (5.6) | 17.5 (4.1) | 0.07 |
| Peripheral artery diseasee | 31 (11.5) | 10 (2.3) | 0.37 |  | 31 (11.5) | 49.0 (11.4) | <0.01 |
| Chronic kidney failuree | 7 (2.6) | 8 (1.9) | 0.05 |  | 7 (2.6) | 14.3 (3.3) | 0.04 |
| Prior GIBe | 30 (11.1) | 30 (7.0) | 0.14 |  | 30 (11.1) | 43.5 (10.2) | 0.03 |
| Disorders indicative of high alcohol intakee,f | 20 (7.4) | 41 (9.6) | 0.08 |  | 20 (7.4) | 34.1 (8.0) | 0.02 |
| **Comedication**f **– current prescription** |  |  |  |  |  |  |  |
| Antihypertensives | 155 (57.4) | 123 (28.7) | 0.60 |  | 155 (57.4) | 226.0 (52.8) | 0.09 |
| Statins | 139 (51.5) | 52 (12.1) | 0.93 |  | 139 (51.5) | 187.3 (43.8) | 0.15 |
| NSAIDs | 16 (5.9) | 35 (8.2) | 0.09 |  | 16 (5.9) | 22.0 (5.1) | 0.03 |
| SSRIs | 44 (16.3) | 24 (5.6) | 0.35 |  | 44 (16.3) | 74.0 (17.3) | 0.03 |
| PPIs | 63 (23.3) | 70 (16.4) | 0.18 |  | 63 (23.3) | 102.7 (24.0) | 0.02 |

Abbreviations: GIB: gastrointestinal bleed; NSAID: nonsteroidal anti-inflammatory drug; SD: standard deviation; SSRI: selective serotonin reuptake inhibitor; PPI: proton pump inhibitor.

Cells with <5 counts not specified to comply with cell suppression policy.

aCurrent use and no use defined in main text.

bPatients with concurrent use of OACs are excluded from the analyses (n=18).

cInverse probability of treatment used for weighting.4Information extracted from medical records (ICH admission record or, if not recorded there, most recent admission before ICH onset).

dInformation extracted from medical records (ICH admission record or, if not recorded there, most recent admission before ICH onset).

eAccording to data from Danish National Patient Registry or Danish National Prescription Registry

fAccording to data from Danish National Prescription Registry

**eTable 4**. Baseline characteristics of patients with intracerebral hemorrhage by class of antithrombotic (oral anticoagulants vs platelet antiaggregants).

|  | **Crude data** | | |  | **Weighted data**c | | |
| --- | --- | --- | --- | --- | --- | --- | --- |
| **Characteristic, no. (%) unless otherwise stated** | **Current oral anticoagulant use (DOAC or VKA)**a,b  **(n=206)** | **Current platelet antiaggregant use (clopidogrel or aspirin)**a,b  **(n=270)** | **Standardized difference** |  | **Current oral anticoagulant use (DOAC or VKA)**a,b  **(n=206)** | **Current platelet antiaggregant use (clopidogrel or aspirin)**a,b  **(n=270)** | **Standardized difference** |
| Age, mean (SD) | 79.9 (8.3) | 78.8 (9.4) | 0.12 |  | 79.9 (8.6) | 79.6 (9.3) | 0.03 |
| **Sex** |  |  |  |  |  |  |  |
| Men | 114 (55.3) | 132 (48.9) | 0.13 |  | 102.3 (49.7) | 133.3 (49.4) | 0.01 |
| Women | 92 (44.7) | 138 (51.1) | 0.13 |  | 103.7 (50.3) | 136.7 (50.6) | 0.01 |
| **Lifestyle data** |  |  |  |  |  |  |  |
| Smokerd |  |  |  |  |  |  |  |
| Current | 26 (12.6) | 44 (16.3) | 0.10 |  | 26.8 (13.0) | 38.8 (14.4) | 0.04 |
| Former | 68 (33.0) | 79 (29.3) | 0.08 |  | 65.0 (31.6) | 83.1 (30.8) | 0.02 |
| Non-smoker | 94 (45.6) | 121 (44.8) | 0.02 |  | 95.4 (46.3) | 124.3 (46.0) | 0.01 |
| Missing values | 18 (8.7) | 26 (9.6) | 0.03 |  | 18.8 (9.1) | 23.8 (8.8) | 0.01 |
| Alcohol used, weekly units |  |  |  |  |  |  |  |
| ≤7 (women)/≤14 (men) | 174 (84.5) | 213 (78.9) | 0.14 |  | 169.6 (82.3) | 218.2 (80.8) | 0.04 |
| >7 (women)/ >14 (men) | 15 (7.3) | 24 (8.9) | 0.06 |  | 16.5 (8.0) | 24.4 (9.0) | 0.04 |
| Missing values | 17 (8.3) | 33 (12.2) | 0.13 |  | 19.9 (9.6) | 27.5 (10.2) | 0.02 |
| **Medical history** |  |  |  |  |  |  |  |
| Hypertensione,f | 182 (88.3) | 226 (83.7) | 0.13 |  | 179.9 (87.3) | 234.2 (86.8) | 0.02 |
| Diabetese,f | 39 (18.9) | 42 (15.6) | 0.09 |  | 34.6 (16.8) | 46.6 (17.3) | 0.01 |
| Prior ischemic strokee | 45 (21.8) | 76 (28.1) | 0.15 |  | 49.3 (24.0) | 67.3 (24.9) | 0.02 |
| Prior myocardial infarctione | 17 (8.3) | 26 (9.6) | 0.05 |  | 19.2 (9.3) | 26.2 (9.7) | 0.01 |
| Congestive heart failuree | 38 (18.4) | 15 (5.6) | 0.40 |  | 24.9 (12.1) | 30.3 (11.2) | 0.03 |
| Peripheral artery diseasee | 20 (9.7) | 31 (11.5) | 0.06 |  | 19.6 (9.5) | 27.8 (10.3) | 0.03 |
| Chronic kidney failuree | 14 (6.8) | 7 (2.6) | 0.20 |  | 11.6 (5.6) | 15.2 (5.6) | <0.01 |
| Prior GIBe | 27 (13.1) | 30 (11.1) | 0.06 |  | 23.3 (11.3) | 28.6 (10.6) | 0.02 |
| Disorders indicative of high alcohol intakee,f | 15 (7.3) | 20 (7.4) | <0.01 |  | 13.2 (6.4) | 16.9 (6.3) | 0.01 |
| **Concomitant medication**f |  |  |  |  |  |  |  |
| Antihypertensives | 161 (78.2) | 155 (57.4) | 0.46 |  | 141.5 (68.7) | 180.6 (66.9) | 0.04 |
| Statins | 86 (41.7) | 139 (51.5) | 0.20 |  | 98.3 (47.7) | 132.1 (48.9) | 0.02 |
| NSAIDs | 12 (5.8) | 16 (5.9) | <0.0001 |  | 11.7 (5.7) | 14.6 (5.4) | 0.01 |
| SSRIs | 26 (12.6) | 44 (16.3) | 0.10 |  | 28.6 (13.9) | 39.9 (14.8) | 0.03 |
| PPIs | 44 (21.4) | 63 (23.3) | 0.05 |  | 43.0 (20.9) | 58.4 (21.6) | 0.02 |

Abbreviations: DOAC: direct oral anticoagulant; GIB: gastrointestinal bleed; NSAID: nonsteroidal anti-inflammatory drug; SSRI: selective serotonin reuptake inhibitor; PPI: proton pump inhibitor; VKA: vitamin K antagonist.

aCurrent use defined in main text.

bPatients with concurrent use of OACs and platelet antiaggregants were excluded from the analyses (n=18).

cInverse probability of treatment used for weighting.

dInformation extracted from medical records (ICH admission record or, if not recorded there, most recent admission before ICH onset).

eAccording to data from Danish National Patient Registry or Danish National Prescription Registry.

fAccording to data from Danish National Prescription Registry.

**eTable 5**. Clinical parameters at time of admission of patients with intracerebral hemorrhage included in analyses by class of antithrombotic.

|  | **Antithrombotic use** | | |  | **Age & sex adj. OR (95%CI)** | |
| --- | --- | --- | --- | --- | --- | --- |
| **Clinical parameter**  No (%) unless otherwise stated. | **Current OAC use (DOAC or VKA)**  **(n=206)a** | **Current platelet antiaggregant use (aspirin or clopidogrel)**  **(n=270)b** | **No prescription of any antithrombotic**  **(n=428)** |  | **OAC vs no use of any antithrombotic (ref.)** | **Platelet antiaggregant vs no use of any antithrombotic (ref.)** |
| Time from ICH onset to brain CT |  |  |  |  |  |  |
| ≤3 hours | 87 (42.2) | 105 (38.9) | 191 (44.6) |  | 1 (reference) | 1 (reference) |
| >3 to ≤24 hours | 97 (47.1) | 119 (44.1) | 154 (36.0) |  | 1.13 (0.77-1.66) | 1.09 (0.76-1.56) |
| >24 hours | 22 (10.7) | 46 (17.0) | 83 (19.4) |  | 0.58 (0.33-1.02) | 0.85 (0.54-1.34) |
| GCS score on admission, median (IQR)c | 14 (8-15) | 14 (8-15) | 14 (11-15) |  | 0.94 (0.90-0.98) | 0.95 (0.91-0.99) |
| Blood pressure on arrival, mean (SD)d |  |  |  |  |  |  |
| Systolic | 167.0 (32.7) | 170.6 (28.9) | 173.3 (32.7) |  | 1.00 (0.99-1.00) | 1.00 (0.99-1.00) |
| Diastolic | 95.0 (25.9) | 90.3 (20.0) | 93.8 (20.0) |  | 1.01 (1.00-1.02) | 1.00 (0.99-1.01) |
| Acute blood pressure lowering therapye | 86 (41.7) | 119 (44.1) | 217 (50.7) |  | 1.01 (1.00-1.02) | 1.00 (0.99-1.01) |
| Anticoagulant reversal therapy | 78 (37.9) | 5 (1.9) | Not applicable |  | Not applicable | Not applicable |
| Admitted to ICU | 41 (19.9) | 69 (25.6) | 118 (27.6) |  | 1.05 (0.67-1.65) | 1.39 (0.95-2.03) |
| Do-not-resuscitate orders within first 24 hours | 91 (44.2) | 109 (40.4) | 94 (22.0) |  | 2.12 (1.44-3.11) | 1.82 (1.28-2.60) |

Abbreviations: CT: computed tomography; DOAC: direct oral anticoagulant; GCS: Glascow Coma Scale; ICH: intracerebral hemorrhage; ICU: intensive care unit; IQR: interquartile range; OAC: oral anticoagulant; SD: standard deviation; VKA: vitamin K antagonist.

Cells with <5 counts not specified to comply with cell suppression policy.

aPatients with concurrent use of platelet antiaggregants (clopidogrel or low-dose aspirin) are excluded from the analyses (n=18).

bPatients with concurrent use of OACs (n=18) are excluded from the analyses.

cInsufficient information on GCS in <5 patients.

dMissing values for 8, <5, 18 patients in current OAC use, current platelet antiaggregant use, and no use of any antithrombotic, respectively.

eMissing values for 8, 7, 11 patients in current OAC use, current platelet antiaggregant use, and no use of any antithrombotic, respectively.

**eTable 6**. Brain CT characteristics of patients with intracerebral hemorrhage included in analyses by class of antithrombotic.

|  | **Antithrombotic use** | | |  | **Age and sex adj. OR (95%CI)** | |
| --- | --- | --- | --- | --- | --- | --- |
| **Index brain CT characteristics**  No (%) unless otherwise stated | **Current OAC use (VKA or DOAC)**  **(n=206)**1 | **Current single platelet antiaggregant use (aspirin or clopidogrel)**  **(n=270)**a | **No use of any antihrombotic**  **(n=428)** |  | **Current OAC use vs no use of any antithrombotic (ref.)** | **Current single platelet antiaggregant use vs no use of any antithrombotic (ref.)** |
| Hematoma locationb |  |  |  |  |  |  |
| Lobar | 79 (38.3) | 136 (50.4) | 186 (43.5) |  | 1 (reference) | 1 (reference) |
| Deep – Supratentorial | 80 (38.8) | 99 (36.7) | 191 (44.6) |  | 1.23 (0.82-1.83) | 0.83 (0.59-1.18) |
| Deep - Brain stem | 17 (8.3) | <17c | 12 (2.8) |  | 5.31 (2.25-12.56) | 2.33 (1.01-5.38) |
| Deep - Cerebellar | 24 (11.7) | 17 (6.3) | 34 (7.9) |  | 2.15 (1.14-4.05) | 0.78 (0.42-1.47) |
| Holohemispheric | 6 (2.9) | <5c | 5 (1.2) |  | 2.85 (0.78-10.46) | 0.96 (0.24-3.80) |
| Hematoma volume, grouped |  |  |  |  |  |  |
| <30 ml | 128 (62.1) | 171 (63.3) | 322 (75.2) |  | 1 (reference) | 1 (reference) |
| 30-59 ml | 28 (13.6) | 38 (14.1) | 64 (15.0) |  | 0.97 (0.57-1.62) | 0.97 (0.61-1.54) |
| 60+ ml | 50 (24.3) | 61 (22.6) | 42 (9.8) |  | 2.43 (1.49-3.97) | 2.39 (1.52-3.76) |
| Intraventricular hemorrhage expansion present | 118 (57.3) | 132 (48.9) | 149 (34.8) |  | 2.34 (1.63-3.36) | 1.65 (1.19-2.28) |

Abbreviations: CT: computed tomography; DOAC: direct oral anticoagulant; ICH: intracerebral hemorrhage; OAC: oral anticoagulant; VKA: vitamin K antagonist.

aPatients with concurrent use of OACs (n=18) are excluded from the analyses.

bClassified according to the Cerebral Haemorrhage Anatomical Rating Instrument (CHARTS). In some cells exact numbers are not reported to preserve anonymity.

cExact numbers not provided to comply with cell suppression regulations.

**eTable 7**. Preadmission functional level and living arrangement and post intracerebral hemorrhage functional outcomes and mortality by prior antithrombotic use.

|  | **Antithrombotic use** | | |  | **Age & sex adj. OR (95%CI)** | |
| --- | --- | --- | --- | --- | --- | --- |
| **Outcome, no. (%)** | **Current OAC use**a,b  **(n=206)** | **Current platelet antiaggregant**a,b **use**  **(n=270)** | **No use of any antithrombotic**  **(n=428)** |  | **Current OAC use vs no use of any antithrombotic (reference)** | **Current platelet antiaggregant use vs no use of any antithrombotic (reference)** |
| **Admitted from** |  |  |  |  |  |  |
| Own home | 183 (88.8) | 236 (87.4) | 400 (93.5) |  | 1 (reference) | 1 (reference) |
| Retirement home (or similar arrangement) | 23 (11.2) | 34 (12.6) | 28 (6.5) |  | 1.16 (0.62-2.16) | 1.55 (0.89-2.69) |
| **Discharged to** |  |  |  |  |  |  |
| Pre-ICH living arrangement | 40 (19.4) | 64 (23.7) | 107 (25.0) |  | 1 (reference) | 1 (reference) |
| Rehabilitation | 40 (19.4) | 69 (25.6) | 190 (44.4) |  | 0.62 (0.37-1.06) | 0.71 (0.46-1.09) |
| Retirement home | 27 (13.1) | 36 (13.3) | 47 (11.0) |  | 1.07 (0.57-2.01) | 0.91 (0.52-1.60) |
| Died during acute admission | 99 (48.1) | 101 (37.4) | 84 (19.6) |  | 2.68 (1.64-4.39) | 1.78 (1.14-2.77) |
| **Unaided gait pre-ICH**c | 189 (91.7) | 249 (92.2) | 416 (97.2) |  | 0.41 (0.18-0.92) | 0.40 (0.19-0.87) |
| **Unaided gait post-ICH**c,d |  |  |  |  |  |  |
| At discharge from acute unit | 41 (19.9) | 67 (24.8) | 151 (35.3) |  | 1.14 (1.09-1.20) | 1.09 (1.04-1.13) |
| At discharge from rehabilitation unit | 20 (9.7) | 34 (12.6) | 106 (24.8) |  | 1.39 (1.17-1.65) | 1.21 (1.04-1.39) |
| **Mortality (in-hospital or after discharge)** |  |  |  |  |  |  |
| Day 1 | 58 (28.2) | 47 (17.4) | 38 (8.9) |  | 3.63 (2.25-5.87) | 2.06 (1.28-3.32) |
| Day 7 | 89 (43.2) | 88 (32.6) | 74 (17.3) |  | 3.08 (2.07-4.58) | 1.95 (1.34-2.83) |
| Day 90 | 118 (57.3) | 123 (45.6) | 108 (25.2) |  | 3.20 (2.20-4.66) | 2.04 (1.45-2.87) |

Abbreviations: ICH: intracerebral hemorrhage; OAC: oral anticoagulant.

aCurrent use and no use defined in main text.

bPatients with concurrent use of OAC and platelet antiaggregants (n=18) are excluded from the analyses.

cUnaided by person, but the patient could be using cane, crutches, or zimmer frame.

dOnly patients with unaided gait pre-ICH included.

**eTable 8**. Baseline characteristics of patients with intracerebral hemorrhage by type of oral anticoagulant.

|  | **Crude data** | | |  | **Weighted data**c | | |
| --- | --- | --- | --- | --- | --- | --- | --- |
| **Characteristic, no. (%) unless otherwise stated** | **DOAC current use**a,b  **(n=88)** | **VKA**  **current use**a,b  **(n=136)** | **Standardized difference** |  | **DOAC**  **current use**a,b  **(n=88)** | **VKA**  **current use**a,b  **(n=136)** | **Standardized difference** |
| Age, mean (SD) | 81.1 (8.3) | 78.6 (8.4) | 0.30 |  | 79.2 (8.2) | 79.4 (8.4) | <0.01 |
| **Sex** |  |  |  |  |  |  |  |
| Men | 46 (52.3) | 81 (59.6) | 0.15 |  | 45.6 (51.9) | 76.6 (56.3) | 0.09 |
| Women | 42 (47.7) | 55 (40.4) | 0.15 |  | 42.4 (48.1) | 59.4 (43.7) | 0.09 |
| **Lifestyle data** |  |  |  |  |  |  |  |
| Smokerd |  |  |  |  |  |  |  |
| Current | <13 | 18 (13.2) | 0.02 |  | 10.0 (11.4) | 19.2 (14.2) | 0.08 |
| Former | 30 (34.1) | 46 (33.8) | 0.01 |  | 31.7 (36.0) | 42.1 (31.0) | 0.11 |
| Non-smoker | 43 (48.9) | 57 (41.9) | 0.14 |  | 39.8 (45.2) | 62.4 (45.9) | 0.01 |
| Missing values | <5 | 15 (11.0) | 0.24 |  | 6.5 (7.4) | 12.2 (8.9) | 0.06 |
| Alcohol used, weekly units |  |  |  |  |  |  |  |
| ≤7 (women)/≤14 (men) | 76 (86.4) | 114 (83.8) | 0.07 |  | 75.0 (85.3) | 115.6 (85.0) | 0.01 |
| >7 (women)/>14 (men) | 7 (8.0) | 9 (6.6) | 0.05 |  | 5.0 (5.7) | 8.5 (6.2) | 0.02 |
| Missing values | 5 (5.7) | 13 (9.6) | 0.15 |  | 7.9 (9.0) | 12.0 (8.8) | 0.01 |
| **Medical history** |  |  |  |  |  |  |  |
| Hypertensione,f | 80 (90.9) | 118 (86.8) | 0.13 |  | 79.1 (89.9) | 120.8 (88.9) | 0.03 |
| Diabetese,f | 13 (14.8) | 31 (22.8) | 0.21 |  | 14.2 (16.1) | 27.4 (20.1) | 0.11 |
| Venous thromboembolisme | 18 (20.5) | 20 (14.7) | 0.15 |  | 13.6 (15.5) | 21.2 (15.6) | <0.01 |
| Atrial fibrillatione | 77 (87.5) | 102 (75.0) | 0.32 |  | 70.9 (80.6) | 107.8 (79.2) | 0.03 |
| Prior ischemic strokee | 23 (26.1) | 26 (19.1) | 0.17 |  | 17.1 (19.4) | 30.5 (22.4) | 0.07 |
| Prior myocardial infarctione | 10 (11.4) | 12 (8.8) | 0.08 |  | 8.5 (9.6) | 12.9 (9.5) | 0.01 |
| Congestive heart failuree | 16 (18.2) | 26 (19.1) | 0.02 |  | 16.3 (18.5) | 25.4 (18.7) | <0.01 |
| Peripheral artery diseasee | 7 (8.0) | 13 (9.6) | 0.06 |  | 6.0 (6.8) | 11.5 (8.5) | 0.06 |
| Chronic kidney failuree | <5 | 13 (9.6) | 0.20 |  | 6.0 (6.9) | 9.8 (7.2) | 0.01 |
| Prior GIBe | 11 (12.5) | 20 (14.7) | 0.06 |  | 10.6 (12.1) | 18.3 (13.5) | 0.04 |
| Disorders indicative of high alcohol intakee,f | 10 (11.4) | 7 (5.1) | 0.23 |  | 6.0 (6.9) | 8.0 (5.9) | 0.04 |
| **Concomitant medication**f |  |  |  |  |  |  |  |
| Antihypertensives | 65 (73.9) | 111 (81.6) | 0.19 |  | 69.6 (79.1) | 110.0 (80.9) | 0.04 |
| Statins | 40 (45.5) | 59 (43.4) | 0.04 |  | 41.2 (46.9) | 63.0 (46.3) | 0.01 |
| NSAIDs | 5 (5.7) | 9 (6.6) | 0.04 |  | <5 | 8.0 (5.9) | 0.03 |
| SSRIs | 13 (14.8) | 14 (10.3) | 0.14 |  | 13.3 (15.1) | 19.1 (14.1) | 0.03 |
| PPIs | 18 (20.5) | 31 (22.8) | 0.06 |  | 17.1 (19.4) | 28.8 (21.2) | 0.04 |

Abbreviations: DOAC: direct oral anticoagulant; GIB: gastrointestinal bleed; NSAID: nonsteroidal anti-inflammatory drug; SSRI: selective serotonin reuptake inhibitor; PPI: proton pump inhibitor; VKA: vitamin K antagonist.

Cells with <5 counts not specified to comply with cell suppression policy.

aCurrent use defined in main text.

bConcurrent use of platelet antiaggregants is included in adjustment.

cInverse probability of treatment used for weighting.

dInformation extracted from medical records (ICH admission record or, if not recorded there, most recent admission before ICH onset).

eAccording to data from Danish National Patient Registry or Danish National Prescription Registry

fAccording to data from Danish National Prescription Registry

**eTable 9**. Baseline characteristics of patients with intracerebral hemorrhage by type of platelet antiaggregant.

|  | **Crude data** | | |  | **Weighted data**c | | |
| --- | --- | --- | --- | --- | --- | --- | --- |
| **Characteristics, no. (%) unless otherwise stated** | **Clopidogrel current use**a,b  **(n=111)** | **Aspirin**  **current use**a,b  **(n=177)** | **Standardized difference** |  | **Clopidogrel**  **current use**a,b  **(n=111)** | **Aspirin**  **current use**a,b  **(n=177)** | **Standardized difference** |
| Age, mean (SD) | 79.1 (9.7) | 78.3 (9.2) | 0.08 |  | 79.0 (9.5) | 78.5 (9.0) | 0.05 |
| **Sex** |  |  |  |  |  |  |  |
| Men | 61 (55.0) | 82 (46.3) | 0.17 |  | 53.7 (48.4) | 85.1 (48.1) | 0.01 |
| Women | 50 (45.0) | 95 (53.7) | 0.17 |  | 57.3 (51.6) | 91.9 (51.9) | 0.01 |
| **Lifestyle data** |  |  |  |  |  |  |  |
| Smokerd |  |  |  |  |  |  |  |
| Current | 20 (18.0) | 27 (15.3) | 0.07 |  | 18.0 (16.2) | 29.8 (16.9) | 0.02 |
| Former | 37 (33.3) | 50 (28.2) | 0.11 |  | 33.2 (29.9) | 50.0 (28.2) | 0.04 |
| Non-smoker | 47 (42.3) | 80 (45.2) | 0.06 |  | 50.3 (45.3) | 81.1 (45.8) | 0.01 |
| Missing values | 7 (6.3) | 20 (11.3) | 0.18 |  | 9.6 (8.6) | 16.1 (9.1) | 0.02 |
| Alcohol used, weekly units |  |  |  |  |  |  |  |
| ≤7 (women)/ ≤14 (men) | 95 (85.6) | 134 (75.7) | 0.25 |  | 90.7 (81.7) | 142.0 (80.2) | 0.04 |
| >7 (women)/>14 (men) | 7 (6.3) | 18 (10.2) | 0.14 |  | 8.9 (8.1) | 14.8 (8.4) | 0.01 |
| Missing values | 9 (8.1) | 25 (14.1) | 0.19 |  | 11.3 (10.2) | 20.2 (11.4) | 0.04 |
| **Medical history** |  |  |  |  |  |  |  |
| Hypertensione,f | 90 (81.1) | 152 (85.9) | 0.13 |  | 90.6 (81.7) | 145.9 (82.4) | 0.02 |
| Diabetese,f | 13 (11.7) | 34 (19.2) | 0.21 |  | 12.6 (11.4) | 28.8 (16.2) | 0.14 |
| Venous thromboembolisme | <5 | 10 (5.6) | 0.15 |  | <5 | 6.8 (3.8) | 0.04 |
| Atrial fibrillatione | 11 (9.9) | 32 (18.1) | 0.24 |  | 15.2 (13.7) | 25.8 (14.6) | 0.03 |
| Prior ischemic strokee | 50 (45.0) | 30 (16.9) | 0.64 |  | 32.7 (29.5) | 49.0 (27.7) | 0.04 |
| Prior myocardial infarctione | 7 (6.3) | 24 (13.6) | 0.24 |  | 11.2 (10.1) | 19.0 (10.7) | 0.02 |
| Congestive heart failuree | 5 (4.5) | 14 (7.9) | 0.14 |  | <5 | 10.3 (5.8) | 0.07 |
| Peripheral artery diseasee | 10 (9.0) | 21 (11.9) | 0.09 |  | 11.2 (10.1) | 19.4 (11.0) | 0.03 |
| Chronic kidney failuree | 5 (4.5) | 5 (2.8) | 0.09 |  | <5 | 5.5 (3.1) | 0.01 |
| Prior GI-bleedinge | 17 (15.3) | 17 (9.6) | 0.17 |  | 12.7 (11.4) | 20.2 (11.4) | <0.01 |
| Disorders indicative of high alcohol intakee,f | 9 (8.1) | 13 (7.3) | 0.03 |  | 8.5 (7.7) | 12.7 (7.2) | 0.02 |
| **Concomitant medication**f |  |  |  |  |  |  |  |
| Antihypertensives | 55 (49.5) | 115 (65.0) | 0.32 |  | 62.5 (56.3) | 104.1 (58.8) | 0.05 |
| Statins | 61 (55.0) | 91 (51.4) | 0.07 |  | 57.0 (51.3) | 94.2 (53.2) | 0.04 |
| NSAIDs | 7 (6.3) | 11 (6.2) | <0.01 |  | <5 | 9.7 (5.5) | 0.07 |
| SSRIs | 22 (19.8) | 23 (13.0) | 0.19 |  | 21.5 (19.3) | 30.0 (16.9) | 0.06 |
| PPIs | 28 (25.2) | 40 (22.6) | 0.06 |  | 24.9 (22.4) | 41.4 (23.4) | 0.02 |

Abbreviations: GIB: gastrointestinal bleed; ICH: intracerebral hemorrhage; NSAID: nonsteroidal anti-inflammatory drug; SSRI: selective serotonin reuptake inhibitor; PPI: proton pump inhibitor.

aCurrent use defined in main text.

bPatients with concurrent use of clopidogrel and low-dose aspirin were excluded from the analyses (n=17).

cInverse probability of treatment used for weighting.

dInformation extracted from medical records (ICH admission record or, if not recorded there, most recent admission before ICH onset).

eAccording to data from Danish National Patient Registry or Danish National Prescription Registry

fAccording to data from Danish National Prescription Registry

**eTable 10.** Clinical parameters at time of admission of patients with intracerebral hemorrhage included in analyses by type of antithrombotic.

|  | **Type of oral anticoagulant, current use**a,b | | |  | **Type of platelet antiaggregant, current use**a,b | | |
| --- | --- | --- | --- | --- | --- | --- | --- |
| **Clinical parameter**  No (%) unless otherwise stated. | **DOAC**  **(n=88)** | **VKA**  **(n=136)** | **Age and sex adj. OR (95%CI)** |  | **Clopidogrel**  **(n=111)** | **Aspirin**  **(n=177)** | **Age and sex adj. OR (95%CI)** |
| Time from ICH onset to brain CT |  |  |  |  |  |  |  |
| ≤3 hours | 34 (38.6) | 61 (44.9) | 1 (reference) |  | 43 (38.7) | 70 (39.5) | 1 (reference) |
| >3 to ≤24 hours | 47 (53.4) | 57 (41.9) | 1.40 (0.78-2.52) |  | 49 (44.1) | 77 (43.5) | 1.02 (0.60-1.75) |
| >24 hours | 7 (8.0) | 18 (13.2) | 0.83 (0.30-2.28) |  | 19 (17.1) | 30 (16.9) | 1.01 (0.50-2.04) |
| GCS score on admission, median (IQR)c | 14 (8-15) | 14 (7-15) | 1.02 (0.95-1.08) |  | 14 (7-15) | 14 (8-15) | 1.00 (0.94-1.05) |
| Blood pressure on arrival,d mean (SD) |  |  |  |  |  |  |  |
| Systolic | 171.7 (35.8) | 166.7 (32.3) | 1.00 (0.99-1.01) |  | 171.8 (29.3) | 171.7 (30.2) | 1.00 (0.99-1.01) |
| Diastolic | 98.2 (24.6) | 93.6 (26.2) | 1.01 (1.00-1.02) |  | 89.6 (17.7) | 91.5 (21.7) | 1.00 (0.98-1.01) |
| Acute blood pressure lowering therapye | 39 (44.3) | 56 (41.2) | 1.00 (0.99-1.01) |  | 51 (45.9) | 77 (43.5) | 0.98 (0.96-1.00) |
| Anticoagulant reversal therapy | 10 (11.4) | 72 (52.9) | 0.18 (0.09-0.34) |  | NA | NA |  |
| Admitted to ICU | 15 (17.0) | 32 (23.5) | 0.78 (0.37-1.15) |  | 24 (21.6) | 51 (28.8) | 0.69 (0.38-1.27) |
| Do-not-resuscitate orders within first 24 hours | 36 (40.9) | 64 (47.1) | 0.65 (0.37-1.15) |  | 49 (44.1) | 69 (39.0) | 1.17 (0.71-1.93) |

Abbreviations: CT: computed tomography; DOAC: direct oral anticoagulant; GCS: Glascow Coma Scale; ICH: intracerebral hemorrhage; ICU: intensive care unit; IQR; interquartile range; SD: standard deviation; VKA: vitamin K antagonist.

aCurrent use and no use defined in main text.

bPatients with concurrent use of oral anticoagulants and platelet antiaggregants included (n=18).

cInsufficient information on GCS in <5 of 484 patients (exact number not presented to comply with cell suppression policy).

dMissing values for 14 patients of 484 patients (numbers not presented by antithrombotic type to comply with cell suppression policy).

eMissing values for 18 patients of 484 patients (numbers not presented by antithrombotic type to comply with cell suppression policy).

**eTable 11**. Brain CT characteristics of patients with intracerebral hemorrhage included in analyses by type of antithrombotic.

|  | **Oral anticoagulant type, current use**a,b | | |  | **Platelet antiaggregant type, current use**a,b | | |
| --- | --- | --- | --- | --- | --- | --- | --- |
| **Index brain CT characteristics**  No (%) unless otherwise stated | **DOAC**  **(n=88)** | **VKA**  **(n=136)** | **Age and sex adj. OR (95%CI)** |  | **Clopidogrel**  **(n=111)** | **Aspirin**  **(n=177)** | **Age and sex adj. OR (95%CI)** |
| Hematoma locationc |  |  |  |  |  |  |  |
| Lobar | 27 (30.7) | 57 (41.9) | 1 (reference) |  | 57 (51.4) | 84 (47.5) | 1 (reference) |
| Deep – Supratentorial | 40 (45.5) | 49 (36.0) | 1.80 (0.95-3.42) |  | 34 (30.6) | 74 (41.8) | 0.69 (0.40-1.17) |
| Deep - Brain stem | <8d | <14d | 1.21 (0.40-3.69) |  | 10 (9.0) | <6 | 2.94 (0.94-9.24) |
| Deep - Cerebellar | 12 (13.6) | 15 (11.0) | 1.98 (0.78-5.03) |  | <10d | 13 (7.3) | 0.72 (0.27-1.95) |
| Holohemispheric | <5d | <5d | 1.77 (0.32-9.73) |  | <5 d | <5 d | 4.54 (0.45-45.60) |
| Hematoma volume, grouped |  |  |  |  |  |  |  |
| <30 ml | 62 (70.5) | 81 (59.6) | 1 (reference) |  | 74 (66.7) | 112 (63.3) | 1 (reference) |
| 30-59 ml | 10 (11.4) | 20 (14.7) | 0.71 (0.30-1.66) |  | 11 (9.9) | 29 (16.4) | 0.55 (0.26-1.18) |
| 60+ ml | 16 (18.2) | 35 (25.7) | 0.53 (0.26-1.07) |  | 26 (23.4) | 36 (20.3) | 1.12 (0.62-2.02) |
| Intraventricular hemorrhage expansion present | 50 (56.8) | 78 (57.4) | 0.95 (0.54-1.66) |  | 54 (48.6) | 88 (49.7) | 0.95 (0.58-1.53) |

Abbreviations: CT: computed tomography; DOAC: direct oral anticoagulant; VKA: vitamin K antagonist.

aCurrent use defined in main text.

bPatients with concurrent use of oral anticoagulants and platelet antiaggregants included (n=18).

cClassified according to the Cerebral Haemorrhage Anatomical Rating Instrument (CHARTS). In some cells exact numbers are not reported to comply with cell suppression policy.

dExact numbers not provided to comply with cell suppression regulations.

**eTable 12**. Relative risk of death within 90-days of ICH by type of antithrombotic drug (active comparator analysis) in patients scanned within 24 hours of ICH onset.

|  |  |  | **Relative risk (95% CI) of 90-day death** | |
| --- | --- | --- | --- | --- |
| **Current use**a **of antithrombotic – type** | **No. at risk** | **No. of events** | **Age and sex adjusted** | **Inverse probability weighting adjusted** |
| Oral anticoagulantb |  |  |  |  |
| DOAC | 81 | 44 | 0.75 (0.54-1.03) | 0.80 (0.66-0.97) |
| VKA | 118 | 77 | 1 (reference) | 1 (reference) |
| Platelet antiaggregant drugb |  |  |  |  |
| Clopidogrel | 92 | 51 | 1.15 (0.83-1.58) | 1.11 (0.91-1.35) |
| Aspirin | 147 | 73 | 1 (reference) | 1 (reference) |

Abbreviation: DOAC: direct oral anticoagulant; ICH: intracerebral hemorrhage; VKA: vitamin K antagonist.

aCurrent use and no use defined in main text.

bPatients with concurrent use of oral anticoagulants and platelet antiaggregants included (n=18).

**eTable 13**. Relative risk of death within 90-days of intracerebral hemorrhage in patients with current use of DOAC vs VKA – only naive users included.

|  |  |  | **Relative risk (95% CI) of death** | |
| --- | --- | --- | --- | --- |
| **Current use**a **of oral anticoagulant**b **– naive users only** | **No. at risk** | **No. of events** | **Age and sex adjusted** | **Inverse probability weighting adjusted** |
| DOAC | 44 | 20 | 0.76 (0.47-1.23) | 0.91 (0.72-1.15) |
| VKA | 101 | 55 | 1 (reference) | 1 (reference) |

Abbreviation: DOAC: direct oral anticoagulant; VKA: vitamin K antagonist.

aCurrent use and no use defined in main text.

bPatients with concurrent use of platelet antiaggregants included.

**eTable 14**. Relative risk of death within 90-days of intracerebral hemorrhage in patients with current use of a DOAC vs VKA – only patients not treated with reversal agent included.

|  |  |  | **Relative risk (95% CI) of death** | |
| --- | --- | --- | --- | --- |
| **Current use**a **of oral anticoagulant**b **– patients not treated with reversal agent only** | **No. at risk** | **No. of events** | **Age and sex adjusted** | **Inverse probability weighting adjusted** |
| DOAC | 78 | 44 | 0.70 (0.58-0.86) | 0.86 (0.73-1.02) |
| VKA | 64 | 43 | 1 (reference) | 1 (reference) |

Abbreviation: DOAC: direct oral anticoagulant; VKA: vitamin K antagonist.

aCurrent use and no use defined in main text.

bPatients with concurrent use of platelet antiaggregants included.

**eTable 15**. Relative risk of death within 90-days of intracerebral hemorrhage in patients with current use of a DOAC vs VKA – VKA exposure defined by a combination of prescription data (current or recent VKA prescription) and an INR>1.5.

|  |  |  | **Relative risk (95% CI) of death** | |
| --- | --- | --- | --- | --- |
| **Current use**a **of oral anticoagulant**b | **No. at risk** | **No. of events** | **Age and sex adjusted** | **Inverse probability weighting adjusted** |
| DOAC | 88 | 45 | 0.78 (0.57-1.05) | 0.84 (0.69-1.03) |
| VKA | 121 | 75 | 1 (reference) | 1 (reference) |

Abbreviation: DOAC: direct oral anticoagulant; VKA: vitamin K antagonist.

aCurrent use of VKA use defined as prior prescriptions with a supply covering the date of ICH onset (index date) or up to 30-days before index date (corresponding to current or recent VKA use in the main analysis) and an INR>1.5 at time of admission. DOAC current use defined as in main analysis, i.e., prior prescriptions with a supply covering the index date.

bPatients with concurrent use of platelet antiaggregants included.

**eTable 16.** Change in volume of hematoma on first control scan performed within 3 days of index CT in selected patients with intracerebral hemorrhage.

|  | **OAC current use**a,b  **(n=61)** | **PA current use**a,c  **(n=21)** | **No use of any AT**a,c  **(n=38)** |
| --- | --- | --- | --- |
| Time from index to first control CT, hours, median (IQR) | 20 (5-30) | 24 (9-36) | 13 (4-26) |
| Neurosurgical intervention | 9 | 7 | 10 |
| Change in hematoma volume, all |  |  |  |
| Median (IQR) | 5 (2-8) | 2 (1--12) | 2 (3-4) |
| Proportion with change >1/3 of index volume | 26.2% | 23.8% | 23.7% |
| Proportion with change ≥6ml of index volume | 36.1% | 23.8% | 26.3% |
| Change in hematoma volume – only patients with no neurosurgical intervention included |  |  |  |
| Median (IQR) | 5 (2-9) | 2 (1-12) | 6 (1-14) |
| Proportion with change ≥33% of index volume | 24.6% | 14.3% | 10.5% |
| Proportion with change ≥6ml of index volume | 32.8% | 19.0% | 18.4% |

Abbreviations: AT: antithrombotic; OAC: oral anticoagulant; PA: platelet antiaggregant.

aCurrent use and no use defined in main text.

bNumber of patients with follow-up scans were evaluated among 184 of 206 patients on OAC (follow-up scans not included for technical reasons in 18 patients).

cNumber of patients with follow-up scans were evaluated among 171 of a random sample of 200 patients from the ICH cohort classified as no use an OAC (follow-up scans not included for technical reasons in 29 patients).

**eTable 17.** Relative risk of death within 90-days of intracerebral hemorrhage in patients with current use of an antithrombotic drug stratified by do-not-resuscitate orders given within 24 hours of admission.

| **Comparison with no use of any antithrombotic** | | | | | | | | | |
| --- | --- | --- | --- | --- | --- | --- | --- | --- | --- |
|  | **DNR not given** | | | |  | **DNR given** | | | |
|  |  |  | **Relative risk (95%CI) of death** | |  |  |  | **Relative risk (95%CI) of death** | |
| **Current antithrombotic use**a | **No. at risk** | **No. of events** | **Age and sex adjusted** | **Standardized mortality ratio weighting adjusted**b |  | **No. at risk** | **No. of events** | **Age and sex adjusted** | **Standardized mortality ratio weighting adjusted**b |
| Oral anticoagulantc (DOAC or VKA) | 115 | 36 | 1.96 (1.48-2.60) | 1.57 (1.22-2.02) |  | 91 | 82 | 1.49 (0.87-2.54) | 1.07 (0.74-1.56) |
| Platelet antiaggregantc (aspirin or clopidogrel) | 161 | 27 | 1.27 (0.94-1.74) | 1.23 (0.96-1.58) |  | 109 | 96 | 1.32 (0.88-1.98) | 1.06 (0.74-1.53) |
| No use of any antithrombotic | 334 | 32 | 1 (reference) | 1 (reference) |  | 94 | 76 | 1 (reference) | 1 (reference) |
| **Active comparator analyses** | | | | | | | | | |
|  |  |  | **Relative risk (95% CI) of death** | |  |  |  | **Relative risk (95% CI) of death** | |
| **Current antithrombotic use**a | **No. at risk** | **No. of events** | **Age and sex adjusted** | **Inverse probability weighting adjusted**d |  | **No. at risk** | **No. of events** | **Age and sex adjusted** | **Inverse probability weighting adjusted**d |
| **Class of antithrombotic** |  |  |  |  |  |  |  |  |  |
| Oral anticoagulantc (DOAC or VKA) | 115 | 36 | 1.56 (1.19-2.04) | 1.39 (1.17-1.64) |  | 91 | 82 | 1.07 (0.65-1.77) | 1.15 (0.80-1.66) |
| Platelet antiaggregantc (aspirin or clopidogrel) | 161 | 27 | 1 (reference) | 1 (reference) |  | 109 | 96 | 1 (reference) | 1 (reference) |
| **Type of antithrombotic** |  |  |  |  |  |  |  |  |  |
| Oral anticoagulante |  |  |  |  |  |  |  |  |  |
| DOAC | 52 | 13 | 0.77 (0.47-1.24) | 0.95 (0.74-1.22) |  | 36 | 31 | 0.75 (0.35-1.62) | 0.75 (0.46-1.21) |
| VKA | 72 | 24 | 1 (reference) | 1 (reference) |  | 64 | 59 | 1 (reference) | 1 (reference) |
| Platelet antiaggregant druge |  |  |  |  |  |  |  |  |  |
| Clopidogrel | 62 | 10 | 0.99 (0.58-1.71) | 1.09 (0.83-1.43) |  | 49 | 43 | 0.95 (0.49-1.82) | 1.12 (0.66-1.93) |
| Aspirin | 108 | 18 | 1 (reference) | 1 (reference) |  | 69 | 62 | 1 (reference) | 1 (reference) |

Abbreviation: DOAC: direct oral anticoagulant; VKA: vitamin K antagonist.

aCurrent use defined in method section.

bBinomial regression adjusted for age, sex, smoking, alcohol use, hypertension, diabetes, prior ischemic stroke, prior myocardial infarction, congestive heart failure, peripheral artery disease, chronic kidney failure, gastrointestinal bleeds, disorders indicative of high alcohol intake and current use of medications (separate variables for: drugs with antihypertensive effects, statins, NSAIDs, SSRIs, PPIs and platelet antiaggregants).

cPatients with concurrent use of oral anticoagulants and platelet antiaggregant excluded (n=9).

dBinomial regression adjusted for age, sex, smoking, alcohol use, hypertension, diabetes, venous thromboembolism, atrial fibrillation, prior ischemic stroke, prior myocardial infarction, congestive heart failure, peripheral artery disease, chronic kidney failure, gastrointestinal bleeds, disorders indicative of high alcohol intake and current use of medications (separate variables for: drugs with antihypertensive effects, statins, NSAIDs, SSRIs, PPIs and platelet antiaggregants).

ePatients with concurrent use of oral anticoagulant and platelet antiaggregant included (n=9).

**eFigure 1**. Study design illustrated through cases with intracerebral hemorrhage (ICH). Cases 1 and 2 also classified as oral anticoagulant users. Cases 3 and 4 also classified as platelet antiaggregant users.
